# Sex differences in behavioural and anatomical estimates of visual acuity in the green swordtail *Xiphophorus helleri*

Eleanor M. Caves<sup>1,2\*</sup>, Fanny de Busserolles<sup>3</sup> and Laura A. Kelley<sup>1</sup>

<sup>1</sup>University of Exeter, Centre for Ecology and Conservation, Penryn UK

<sup>2</sup>University of California Santa Barbara, Department of Ecology, Evolution, and Marine Biology,  
Santa Barbara, CA, USA

<sup>3</sup>The University of Queensland, Queensland Brain Institute, Brisbane Australia

\*address for correspondence: eleanor\_caves@ucsb.edu

**Key words:** Visual signal; retinal topography; spatial resolution; sensory ecology; optomotor

## Summary statement

We anatomically and behaviourally quantified visual acuity (spatial resolving power) in green swordtails. Anatomically, acuity was identical in both sexes, but behaviourally was higher in females, with implications for signalling.

## Abstract

Among fishes in the family Poeciliidae, signals such as colour patterns, ornaments, and courtship displays play important roles in mate choice and male-male competition. Despite this, visual capabilities in Poeciliids are understudied, in particular visual acuity, the ability to resolve detail. We used three methods to quantify visual acuity in male and female green swordtails (*Xiphophorus helleri*), a species in which body size and the length of the male's extended caudal fin ('sword') serve as assessment signals during mate choice and agonistic encounters. Topographic distribution of retinal ganglion cells (RGC) was similar in all individuals and characterized by areas of high cell densities located centro-temporally and nasally, as well as a weak horizontal streak. Based on the peak density of RGC in the centro-temporal area, anatomical acuity was estimated to be approximately 3 cycles/degree (cpd) in both sexes. However, a behavioural optomotor assay found significantly lower mean acuity in males (0.8 cpd) than females (3.0 cpd), which was not explained

by differences in eye size between males and females. An additional behavioural assay, in which we trained individuals to discriminate striped gratings from grey stimuli of the same mean luminance, also showed lower acuity in males (1-2 cpd) than females (2-3 cpd). Thus, although retinal anatomy predicts identical acuity in males and females, two behavioural assays found higher acuity in females than males, a sexual dimorphism which is rare outside of invertebrates. Overall, our results have implications for understanding how Poeciliids perceive visual signals during mate choice and agonistic encounters.

## Introduction

Many animals use signals to communicate in interactions such as mate choice and aggression, and one important selective pressure on the form of those signals is the perceptual system of the receiver. In the case of visual signals, understanding how a signal is perceived requires knowledge of the receiver's visual capabilities, including visual acuity, the ability to perceive detail. Visual acuity (which is sometimes referred to as spatial resolving power) is an ecologically and behaviourally important visual parameter, as it determines what can and cannot be resolved in a given scene (Cronin et al., 2014). Thus, quantifying visual acuity can provide insight into what visual information a species can extract from its environment, and thus how it might place selection pressure on visual signals (Caves et al., 2018). Broadly, acuity can be estimated anatomically (by measuring the density and spacing of cells in the retina) or behaviourally (using trained or innate responses). Although studies directly comparing behavioural and anatomical acuity are rare, in those studies that do exist, there is inconsistency in whether the methods yield comparable estimates (e.g. Goller et al., 2019; Harman et al., 1986; Temple et al., 2013) or different estimates (e.g. Champ et al., 2014; Parker et al., 2017). Comparing anatomical and behavioural acuity can provide insights into how retinal anatomy as well as post-retinal processing can influence a species' ability to discriminate detail.

Visual acuity is highly variable across species, varying by at least four orders of magnitude across animals with image-forming eyes (Caves et al., 2018). Acuity is reported in units called cycles per degree (cpd), which is the number of pairs of black and white stripes a viewer can resolve in a single degree of visual angle (higher values in cpd indicate sharper vision). Some of the highest acuities are found in birds of prey (wedge-tailed eagle *Aquila audax* 140cpd, Reymond, 1985) and in humans (approximately 60cpd; e.g., Campbell and Gubisch, 1967; Curcio and Allen, 1990), while the lowest are found in small compound eyes like those of *Drosophila melanogaster* (0.01 cpd; Gonzalez-Bellido et al., 2011). Among ray-finned fishes, published measures of acuity range from

approximately 1 cpd in the Japanese Rice Fish *Oryzias latipes* (Carvalho et al., 2002) to approximately 30 cpd in species like the collared large-eye bream *Gymnocranius audleyi* (Collin and Pettigrew, 1989) and the sailfish *Istiophorus albicans* (Tamura and Wisby, 1963). Aside from eye type (e.g. camera eye or compound eye), the primary factor underlying variation in acuity across species is variation in eye size, with higher acuity typically found in larger eyes (Caves et al., 2018). In ray-finned fish, variation in eye size explains about 55 percent of variation in acuity (Caves et al., 2017). Various ecological parameters are also important correlates of acuity in fish. In particular, species that live in spatially complex habitats like coral reefs and kelp forests have higher acuity relative to their body size than those that live in horizon-dominated or featureless habitats (Caves et al., 2017; Dobberfuhl et al., 2005).

Anatomically, limits on acuity can be imposed by the optical properties of the lens and the spacing of the retinal neurons. In fish, however, anatomical estimates of acuity mostly depend on the retinal morphology, since fish have very accommodating lenses (Douglas and Hawryshyn, 1990). In terms of retinal morphology, the retinal ganglion cells (RGCs), which are the final stage of retinal processing and are the only retinal cells that connect to the brain, represent the upper limit of spatial resolving power (Collin and Pettigrew, 1989). To measure RGC density, one can examine retinal topography using the retinal wholemount technique (Stone, 1981; Ullmann et al., 2012), which allows the analysis of the entire retina and the identification of areas of high cell density or retinal specializations. These specializations, which provide higher acuity in a specific part of the visual field, are usually classified in two main types, ‘areas’ and ‘streaks’, where the increase in cell density is concentric or elongated across the retinal meridian, respectively. Variability in the type of specialization and its localization often correlates with the ecology and behaviour of a particular species and has been shown in fish to vary with habitat type, feeding ecology, predator or conspecific detection, and life stage (Collin and Pettigrew, 1988a; Collin and Pettigrew, 1988b; de Busserolles et al., 2014; de Busserolles et al., 2021; Luehrmann et al., 2020; Shand et al., 2000; Stieb et al., 2019; Tettamanti et al., 2019).

Behaviourally estimating acuity can be accomplished by assessing either the innate or trained responses of an animal. For example, the optomotor response, a taxonomically widespread innate response to wide-field visual stimulation, can be elicited by placing an animal in a rotating drum surrounded by a grating of vertical black and white stripes (see Caves et al., 2020). The striped grating is rotated, and if the animal can resolve the stripes, it reflexively turns or moves its body, head, or eyes to track the rotation (McCann and MacGinitie, 1965). If an animal cannot resolve the stripes—i.e. they are below its acuity limit—the optomotor response is absent. Another way to

behaviourally measure acuity involves conditioning an animal to associate either a grating of black and white stripes or a uniform grey stimulus of the same mean luminance with a food reward. The ability of the animal to discriminate the stimuli is then tested with grating stimuli of varying spatial frequency (e.g., Baerends et al., 1960; Br  nner, 1934; Champ et al., 2014; Parker et al., 2017; Penzlin and Stubbe, 1977). The spatial frequency where the animal can no longer reliably distinguish the two stimuli is its acuity limit.

Each of these methods has advantages and disadvantages. The primary disadvantage of anatomical measures is that they cannot account for diffraction and other optical imperfections (e.g., Browman et al., 1990; Haug et al., 2010; Lee and O’Brien, 2011), spatial and temporal summation, or other forms of higher-order neural processing of visual signals, all of which may limit the resolution of an eye. Moreover, errors in cell differentiation during the retinal mapping analysis, resulting in the inclusion of “displaced” amacrine cells or the omission of small ganglion cells, could over/underestimate cell densities and therefore visual acuity measures (Collin and Pettigrew, 1989; Pettigrew and Manger, 2008; Pettigrew et al., 1988). Behavioural methods, however, can yield variable results due to differences in motivation amongst individuals or species (Niv et al., 2006). Additionally, assays like optomotor employ moving stimuli, and so may be affected by an animal’s ability to respond to or perceive motion (e.g. Neave, 1984; Westheimer and McKee, 1975), in addition to its acuity. Given the issues associated with each method, best practice may be to use multiple approaches to give a better estimate of acuity in a given species (as in, e.g., Parker et al., 2017).

Fishes in the family Poeciliidae are an ideal system in which to examine relationships between visual signals and visual acuity. They are a model system in the study of mate choice, and use visual signals in both female mate choice and male-male competition. These visual signals can involve colours or patterns (e.g., Basolo and Trainor, 2002; Cummings et al., 2003; Kodric-Brown and Johnson, 2002; Schl  ter et al., 1998), structural ornaments (e.g., Basolo, 1990a; Benson and Basolo, 2006; MacLaren et al., 2004; Rosenthal and Evans, 1998; Schlupp et al., 2010), or courtship displays (e.g., Kodric-Brown and Nicoletto, 2001; Kodric and -Brown, 1993; Rosenthal and Evans, 1998). Despite the diversity and importance of visual signals in this group, very little is known about visual acuity in the Poeciliidae.

Here, we measured visual acuity in *Xiphophorus helleri*, the green swordtail, using one anatomical and two behavioural methods. *X. helleri* was chosen because the spatial aspects of visual signals play a key role in both female mate choice and male-male competition. In particular, male green swordtails display colourful elongations of their caudal fins, known as swords, and females

exhibit preferences for males based on sword length (e.g. Basolo, 1990a; Basolo, 1990b). Additionally preferences for larger males are widely present in Poeciliids, including in *X. helleri* (e.g. Basolo, 2004; Bischoff et al., 1985; MacLaren, 2017; MacLaren et al., 2011; Rosenthal and Evans, 1998; Ryan and Wagner, 1987). Sword length and body size are also important visual signals in the context of male-male competition. Specifically, males with longer swords experience more aggression from competitors (Franck and Hendricks, 1973; Hemens, 1966) and also have greater competitive success (Benson and Basolo, 2006). To understand how male and female green swordtails perceive traits such as sword length and body size, we used retinal topography to determine RGC peak density and estimate anatomical acuity, and both optomotor assays and conditioned responses to estimate behavioural acuity.

## Methods

### *Subjects and Housing*

All animals were treated in accordance with the ethical guidelines of the University of Exeter (ethics approval eCORN002243). Fish handling and experiments were carried out by EM Caves (Home Office Personal License I56658687) under Home Office Project License PF6E68517. All fish used in this experiment were sexually-mature descendants of a wild-derived population originally collected in Belize in 2002. Fish were housed in mixed-sex groups of 4-7 individuals in 30-litre tanks and fed with a mixture of bloodworm, mysis shrimp, and artemia each morning and flake food (ZM Flake, Fish Food and Equipment, Hampshire UK) each evening. Water temperature was kept between 22 and 24°C and tanks were lit from above with AquaBeam LED lights (Tropical Marine Centre Ltd, Herefordshire UK) on a 12:12 light:dark cycle (although during portions of one covid-19 lockdown, the light cycle was temporarily shifted to 15:9 light:dark cycle). All fish were tagged with an individually-identifiable combination of elastomer tags (Northwest Marine Technology Inc, Washington USA). After the optomotor assay experiment, three males and three females were humanely euthanised in a lethal dose of buffered MS-222, and their head fixed in 4% paraformaldehyde in 0.1M phosphate buffer for use in preparation of retinal wholemounts (see below).

### *Measuring eye and body size*

We used photos of each individual to measure eye and body size. Fish were very briefly removed from their tank, and at least four photos were taken with a size standard present in the frame. For males, we ensured that their sword was fully extended to allow for measurement of sword length. From each photo, we measured standard length (the length from the tip of the snout to the posterior end of the caudal fin, thus excluding the length of the caudal fin; hereafter, body size) and the diameter of the visible portion of the eye (hereafter, eye size) using Image J (Schneider et al., 2012). Because multiple images were taken of each individual, we measured eye and body size in each photo and used the average value in analyses. Note that measures of “eye size” were taken from live individuals who were then used further in behavioural trials, meaning we could not dissect out the eye and measure the entire eye or lens directly. By contrast, in a subset of fish who were euthanized and fixed for retinal ganglion cell mapping (see below), lenses were dissected out of the eye cup and their diameter measured using digital callipers, and these measures are referred to as “lens size” throughout.

### *Preparation of retinal wholemounts*

Retinal wholemounts were prepared for three males and three females according to standard protocols (Coimbra et al., 2006; Stone, 1981; Ullmann et al., 2012). During dissection, the orientation of the retina was kept by making a small incision in the dorsal part of the retina. Each retina was bleached overnight at room temperature in a solution of 3% hydrogen peroxide in 0.1 M phosphate buffer (PBS), rinsed in PBS, and wholemounted, ganglion cell layer facing up, on a gelatinized slide. Each wholemount was left to dry overnight in formalin vapor to improve fixation and cell differentiation (Coimbra et al., 2006; Coimbra et al., 2012), stained in 0.1% cresyl violet (Coimbra et al., 2006) and coverslipped with Entellan New mounting medium (Proscitech). Since the retinal wholemount remained attached to the slide during the entire staining process possible shrinkage during staining was considered negligible and if present confined to the retinal margin (Coimbra et al., 2006).

### *Stereological analyses and topographic map construction*

Following the protocols described in de Busserolles et al. (2014), topographic distribution of RGCs were assessed using the optical fractionator technique (West et al., 1991) modified by Coimbra et al. (Coimbra et al., 2009; Coimbra et al., 2012). Briefly, the outline of each retinal wholemount was digitized using a x5 objective (numerical aperture 0.16) mounted on a compound microscope (Zeiss

Imager.Z2) equipped with a motorized stage (MAC 6000 System, Microbrightfield, USA), a digital colour camera (Microbrightfield, USA) and a computer running StereoInvestigator software (Microbrightfield, USA). RGCs were randomly and systematically counted using a x63 objective (numerical aperture 1.40). The counting frame and grid size were chosen carefully to maintain the highest level of sampling and achieve an acceptable Schaeffer coefficient of error ( $CE < 0.1$ , Glaser and Wilson, 1998). A counting frame of  $60 \mu\text{m} \times 60 \mu\text{m}$  was used for all individuals. The grid size was adjusted between individuals to take into consideration the variation in size between specimens and allow sampling of around 200 sites per retina (Table 1). To estimate the peak density of RGCs, sub-sampling was carried out in the area of highest cell density using the same counting frame size but a smaller grid (i.e. half the size of the original grid in Table 1). RGCs were arranged in a single layer within the ganglion cell layer and were easily identified from displaced amacrine cells and glial cells using cytology criteria alone (Collin and Pettigrew, 1988c; Hughes, 1975, Fig. 1). Consequently, we are very confident that only RGCs were counted in the analysis.

Topographic maps were constructed in R v.4.1.0 (R Foundation for Statistical Computing, 2021) with the results exported from the Stereo Investigator Software according to Garza-Gisholt et al. (2014). The Gaussian kernel smoother from the Spatstat package (Baddeley and Turner, 2005) was used and the sigma value was adjusted to the grid size.

#### *Estimation of anatomical acuity*

The upper limit of acuity in cycles per degree was estimated for each individual using the peak density of ganglion cell (PDG in cells/mm) as described by Collin and Pettigrew (1989). Briefly, the angle subtending 1 mm on the retina (angle  $\alpha$ ) can be calculated as follows:

$$\alpha = \arctan(1/f)$$

Where  $f$ , the focal length or distance from the center of the lens to the retina, is 2.55 times the radius of the lens in teleost fishes (Matthiessen's ratio; Matthiessen, 1882). Knowing  $\alpha$ , the PDG and the fact that two ganglion cells are needed to distinguish a visual element from its neighbor, the acuity in cycles per degree (cpd) can be calculated as follow:

$$\text{acuity} = (\text{PDG}/\alpha)/2$$



## **Behavioral Acuity**

### **Stimuli**

We used data on the maximum and common body size of *X. helleri* (16 cm and 3cm, respectively) from FishBase.org (Froese and Pauly, 2000), and the relationship between acuity and body size in ray-finned fishes (Caves et al., 2017) to estimate that acuity in *X. helleri* would likely be between approximately 3 and 5cpd. Therefore, we designed stimuli that, accounting for the viewing distance of 17.5 cm in our experimental setups, were 0.2, 0.4, 0.6, 0.8, 1.0, 2.0, 3.0, 4.0, 5.0, and 6.0 cpd, to both cover and extend beyond the range of predicted acuities. Stimuli were black and white square waves printed using a laser printer (HP Colour LaserJet M553, Hewlett-Packard Company, USA) on waterproof paper (Premium NeverTear, 120 micron thickness, 160gsm weight, Xerox, Connecticut USA). As a control, we used solid grey stimuli. For the optomotor assay, the precise shade of grey was not as important as the absence of any spatial stimuli. Therefore, the optomotor control stimulus was created using cardstock (175gsm weight, Darice Inc., Ohio, USA). For the trained two-choice assay, the average brightness of the grey stimulus needed to match the striped stimulus. Therefore, we photographed a printed black and white striped stimulus alongside two grey standards made from Zenith diffuse sintered PTFE sheet (Labsphere, Congleton, UK) with 96.2 and 4.5% reflectance, using a Sony  $\alpha 7$  camera fitted with a 28-70mm lens. We then calibrated the stimulus to the standards to extract the reflectance values of white and black (91 and 6%, respectively) using an image analysis toolbox in ImageJ (Troschianko and Stevens, 2015). To create the grey control stimulus using the mid-point of these values (42.5%), we printed grey squares that incrementally increased in grey value (where a pixel value of 0 is black and 255 is white) using Inkscape. These were photographed to extract reflectance values as described above, and the pixel value that created 42.5% reflectance was identified (pixel value 173).

### **Measuring acuity using an Optomotor Assay**

The optomotor apparatus used here is described in detail in Caves et al. (2020). Briefly, during optomotor trials, an individual was placed inside a water-filled 30-cm diameter cylindrical tank made of extruded clear acrylic (which has a low refractive index, minimizing visual distortion when submerged underwater). The experimental tank was placed inside of a drum that measured 35 cm in diameter, and which was lined with the square wave stimuli (Fig. 2A). We rotated the drum at a constant speed of 1 rotation/minute, an optimal speed for eliciting robust, repeatable responses determined during preliminary experiments. Microstepping allowed the motor to achieve 3200 steps per revolution, maintaining smooth rotation even at low rotation speeds. The optomotor tank was



illuminated from directly overhead by a full spectrum arc lamp (Iwasaki EyeColor 6500K, Iwasaki Electroc Co. Ltd., Japan) fitted with a 70W electronic ballast (Venture Lighting Europe Ltd., Herefordshire UK). Light from the arc lamp was filtered through a sheet of 0.25mm PTFE plastic (Bay Plastics Ltd, UK) to provide diffuse, even lighting.

Prior to the beginning of each trial, an individual was placed in the test arena and allowed to acclimate to the tank and the ambient lighting for 10 minutes, during which time the control stimulus was placed around the tank. At the beginning of the acclimation period, a clear acrylic cylinder 10cm in diameter was placed around the animal and centred in the testing arena, to minimize the animal's movements towards and away from the stimulus during testing. To begin a trial, a stimulus between 0.4 and 6 cycles/degree was randomly selected and placed around the tank. Starting direction (clockwise or counter-clockwise) was determined randomly using the sample function in R (R Development Core Team, 2019). Each stimulus was rotated for 45 seconds in the starting direction, and then after a five second break, rotated for 45 seconds in the opposite direction. That pattern was then repeated, so in total each fish saw each stimulus for two clockwise and two counter-clockwise rotations. Fish were then given two minutes before a second randomly-selected stimulus was presented, and so on.

Fish were tested on all stimuli during a single trial that lasted approximately one hour. To end the trial, fish were shown the 0.2cpd stimulus, the stimulus with the thickest stripes, that elicited robust responses during preliminary trials. This stimulus was presented last to ensure that fish had remained motivated or capable of performing optomotor responses throughout the trial; all fish exhibited positive responses to the 0.2cpd stimulus. The grey control was used once during each trial. Temperature was noted at both the start and end of a trial, and remained between 22 and 24°C throughout.

All trials were video recorded from above using a GoPro (Hero 3+, GoPro Corporation, California USA). Videos were annotated by two viewers who were blind to the identity and direction of rotation of the stimulus. First, viewers noted whether fish exhibited stress behaviour during any one of the four rotations, defined as quick, random darting motion around the tank; any rotation in which stress behaviour was observed (which occurred in 94 out of 1895 total rotations) was not used in analyses. Viewers also noted whether eye tracking was visible during the rotation, the direction of the fish's rotation, and whether it rotated 0 to  $\frac{1}{4}$  turn,  $\frac{1}{4}$  to  $\frac{1}{2}$  turn,  $\frac{1}{2}$  to one full turn, or more than one full turn. Between the two viewers, there was 87.9% agreement in annotations, so the annotations from the viewer with more experience with optomotor assays were used for analysis.

Based on preliminary trials with the 0.2cpd stimulus and rotation at 1 rotation/minute, a positive response was determined to occur if either eye tracking or at least  $\frac{1}{2}$  turn in the direction of stimulus rotation occurred in at least 3 out of the 4 trials. The acuity limit was taken to be the finest stimulus to which a fish exhibited a positive response. In total, we collected optomotor data from 28 fish (13 males and 15 females). Of these, two females exhibited positive responses to the control stimulus and so were excluded from data analysis. Additionally, one female was identified as an outlier using Cook's distance (Cook, 1977), and so was not included in analyses, although including her in the analyses did not change the conclusions in any instance. Thus, final sample sizes for analysis of optomotor acuity were 13 males and 12 females.

All analyses were run in R version 4.0.3 (R Development Core Team, 2019). To statistically analyse differences in optomotor acuity between males and females, we used a non-parametric Kruskal-Wallis rank sum test, because the assumptions of a parametric test were not met. Specifically, acuity in males was not normally distributed (Shapiro-Wilk normality test,  $W=0.81$ ,  $p=0.01$ ), and variance in acuity in males and females was not equal (F-test for homogeneity in variances,  $F_{12,12}=8.01$ ,  $p=0.001$ ).

We built linear models using the *lm* function in R to examine relationships between eye size, body size, and optomotor acuity. First, we asked whether the relationship between eye size and body size differed between males and females, by fitting models in which eye size was the response variable and both body size and sex were fixed effects. Second, we examined whether the relationship between acuity and either eye or body size differed between males and females by fitting models in which acuity was the response variable and both sex and a measure of size (either eye size or body size) were fixed effects.

For each analysis, we first fit a full model including both fixed effects and their interaction. After fitting a full model, we used the 'drop1' function in the *lme4* package (Bates et al., 2015) which uses an F test to determine the significance of each fixed effect by comparing the full model to a model without each fixed effect in turn. To avoid problems with stepwise model reduction (Mundry and Nunn, 2009), we removed non-significant interactions to test the main effects, but did not remove non-significant main effects. To confirm that the assumption of normality in the residuals was met, we used diagnostic plots and performed Shapiro-Wilk normality tests on model residuals.

## Measuring acuity using a conditioned discrimination assay

As a second way to behaviourally measure acuity, we used a conditioned discrimination assay in which fish were trained with food rewards to discriminate a neutral grey stimulus from a striped stimulus. Throughout training and testing, fish were moved to 15-litre tanks in which they were physically, but not visually or chemically, isolated from other fish. Modified Y-mazes were built in each tank to control the distance at which fish first viewed the striped stimuli (Fig. 2B). The Y-mazes comprised a central divider which created two compartments (left and right) which the fish observed from behind a clear acrylic barrier. The central divider was 17.5 cm in length, so when the fish viewed the left and right compartments from behind the acrylic barrier, the viewing distance was approximately 17.5 cm, the same viewing distance as in the optomotor trials.

At the beginning of each trial, opaque dividers were placed in between neighbouring tanks to visually isolate fish from one another. A GoPro camera (Hero3+, GoPro Corporation, CA USA) was placed at the back of each tank to record the trials. Because acuity can vary with the brightness of ambient light (e.g. Abdeljalil et al., 2005; Caves et al., 2016), during trials, each tank was lit from above with an LED light panel (Hersmay CHD-160A) fit with a diffuser, to achieve the same overall brightness (measured in lux) as in the optomotor assay. Fish were given ten minutes to acclimate to the lighting conditions and the presence of the camera before trials were run.

Prior to each trial, the sample function in R was used to randomly assign the grey and grating stimuli to the left or right compartments. To start a trial, the clear barrier was slid into position to keep the fish at least 17.5 cm from the stimuli, and the stimuli were displayed in the left and right compartments, at which point the fish were allowed approximately 20 seconds to view the stimuli before the barrier was raised. The fish was given up to three minutes to make a choice by approaching one stimulus or the other. The choice was taken as the first compartment entered by a fish after raising the barrier. If the fish correctly selected the grey (positive) stimulus, it was rewarded with a bloodworm.

Initially, to condition fish to associate the grey stimulus with a reward, we displayed only grey stimuli until the fish would reliably approach the stimuli after the barrier was lifted. We then trained the fish to discriminate the grey stimulus from the grating stimulus by offering them a choice between the grating and the grey stimuli, but rewarding only visits to the grey stimulus. The fish were trained in this manner until they chose the grey stimulus in a minimum of 6 out of 7 consecutive trials (a rate of 85% correct choices). Due to ethical regulations regarding the physical isolation of fish, training and data collection had to be carried out in a 3-week period. Therefore, any fish that had not achieved the pass criterion in training trials at the end of two weeks were not advanced to data

collection, to allow sufficient time to collect data. In total, we were able to train and collect data on four males and four females; three males and two females that began training did not pass to data collection.

During data collection, fish first received five “refresher” trials with the 0.2cpd stimulus. This was followed by five to ten trials of another stimulus, with one minute between successive presentations of a given stimulus. Following a two minute break, fish were given five to ten trials of another stimulus, and so on. To confirm that fish had maintained motivation throughout, they were offered a bloodworm in the absence of any stimuli at the end of each trial day; all fish had maintained motivation during the trials. Stimuli were presented in random order. We also randomised which side of the tank (left or right) the positive and negative stimuli were presented on, resulting in a mean  $\pm$  standard deviation of  $48.7 \pm 0.03$  percent of trials in which the positive stimulus was presented on the left-hand side of the tank (range: 44.4 – 53.8%).

We aimed for each individual to receive 15-20 trials with each grating width, but ethical restrictions on the length of time for which fish could be isolated meant that some fish did not achieve the target number of trials (median: 15 trials per stimulus per individual; range: 9-21). A fish was deemed to have been able to discriminate the striped stimulus from the grey stimulus significantly better than chance if their success rate was 73% or higher (chosen as the threshold for significant deviation from chance in a two-alternative forced choice test, based on a binomial test,  $n=15$  trials,  $p<0.05$ ).

## Results

### *RGC topographic distribution and anatomical acuity*

The topographic distribution of RGCs was investigated in three males and three females. Overall, intraspecific variability in RGC distribution and density was very low and no obvious differences between sexes were observed. A representative RGC topographic map for one male and one female is shown in Fig. 3, and maps for all individuals are provided in Fig. S1. All individuals presented the same topography pattern characterised by two areas of high cell densities, an elongated area in the centro-ventral part of the retina where the peak density of RGC lies and a smaller area in the nasal part, as well as a weak horizontal streak.

The total number of RGC was very similar between individuals with a mean total number of 213,883 (Table 1). Peak cell density varied slightly between individuals from 27,222 to 36,389 cells/mm<sup>2</sup>. This variation can be explained by differences in individual size and therefore eye size, with bigger fish having a bigger retinal area and therefore lower cell densities (Table 1). Based on the

peak cell density located in the dorso-temporal area and the lens diameter of each individual, visual acuity was estimated to be approximately 3 cpd for all individuals (mean  $\pm$  standard deviation:  $3.0 \pm 0.06$  cpd in males,  $2.9 \pm 0.06$  cpd in females Table 1).

### ***Optomotor Acuity, Eye Size, and Body Size***

Acuity estimates obtained from an optomotor assay were higher in females ( $n=12$ ; mean  $\pm$  standard deviation:  $3.00 \pm 1.85$  cpd; median: 3.0 cpd; range: 0.4-5 cpd) than in males ( $n=13$ ;  $0.88 \pm 0.69$  cpd; median: 0.8 cpd; range: 0.2-2 cpd), and this difference was significant ( $\chi^2(1) = 8.67$ ,  $p = 0.003$ ) (Fig. 4A).

Males and females did not differ significantly, however, in either eye size (females:  $1.83 \pm 0.15$ mm, males:  $1.83 \pm 0.18$ mm;  $\chi^2(1) = 0.11$ ,  $p = 0.75$ ) or body size (females:  $43.8 \pm 4.98$ mm, males:  $42.5 \pm 5.31$ mm;  $\chi^2(1) = 0.67$ ,  $p = 0.41$ ). Additionally, the relationship between eye and body size did not differ between males and females (Fig. 4B; Table 1). In a model that included eye size as the response variable, and body size, sex, and their interaction as fixed effects, the interaction term was not significant ( $F_1=0.03$ ,  $p=0.86$ ). After dropping the non-significant interaction term, we found that in an additive model, body size, but not sex, was a significant predictor of eye size (body size:  $F_1=45.44$ ,  $p<0.0001$ ; sex:  $F_1=0.71$ ,  $p=0.40$ ).

The relationship between acuity and eye size, however, did differ between males and females (Fig. 4C). In a model that included acuity as the response and eye size, sex, and their interaction as predictors (Table 1), the interaction term and both main effects were significant (eye size:  $F_1=20.59$ ,  $p<0.001$ ; sex:  $F_1=6.46$ ,  $p=0.02$ ; eye size-sex interaction:  $F_1=8.89$ ,  $p=0.007$ ). Together, these results show that mean acuity in females is higher than in males, and that females have higher acuity than do males for a given eye size. However, higher acuity in females is not attributable to females having relatively larger eyes for a given body size than do males.

### ***Conditioned Acuity***

Using an optomotor assay, we found evidence for higher acuity in females than in males. To examine further whether this was a true sexual dimorphism in acuity, or if it had arisen as a result of behavioural differences between the sexes during the optomotor assay, we measured acuity using a conditioned discrimination assay. Four males and four females were tested on their ability to discriminate grating stimuli from a grey stimulus of the same mean luminance. Within each sex, the mean proportion of correct choices (based on which stimulus they approached first in a Y-maze setup) is shown in Fig. 5.

In males, the highest proportion of correct choices ( $0.85 \pm 0.05$ ) occurred in response to the stimulus with the lowest spatial frequency (0.2cpd), whereas in females, the highest proportion of correct choices ( $0.87 \pm 0.06$ ) occurred at 0.4cpd. As a group, males maintained a mean proportion of correct choices above the threshold criterion of 0.73 (see methods) until between 1 and 2 cpd (at 1 cpd:  $0.74 \pm 0.04$ ; at 2cpd:  $0.51 \pm 0.11$ ). Three out of four males performed above the threshold criterion at 1cpd, whereas all four performed below threshold at 2cpd. On average, females maintained performance above the threshold criterion until between 2 and 3cpd (at 2cpd:  $0.79 \pm 0.03$ ; at 3cpd:  $0.65 \pm 0.05$ ). All four females performed above the threshold criterion at 2cpd, but all performed below threshold at 3cpd. Thus, acuity limit estimates using conditioned discrimination assay were between 1 and 2 cpd in males, and between 2 and 3 cpd in females.

## Discussion

The acuity estimates presented here for the green swordtail *Xiphophorus helleri* are the first for any fish in the genus *Xiphophorus*, a genus in which ornaments such as sword length serve as important mate choice and agonistic signals (e.g. Basolo, 1990a; Basolo, 1990b). They are also some of the first measures of acuity in the family Poeciliidae, a model family in the study of how sexual and natural selection influence visual signal evolution. Our primary finding is that estimates from one anatomical and two behavioural methods suggest that acuity in swordtails is between 1 and 3 cpd. These estimates align well with predicted acuity based solely on body size in green swordtails (see Caves et al., 2017) and are also similar to acuity estimates from other small, freshwater fish, for example Japanese rice fish (~1 cpd, Carvalho et al., 2002), goldfish *Carassius auratus* (~1 cpd, Hodos and Yolen, 1976), zebrafish *Danio Rerio* (~2cpd, Pita et al., 2015), and cutlips minnows *Exoglossum maxilingua* (~3 cpd, Collin and Ali, 1994). Second, while anatomical acuity was found to be identical in both males and females (~3cpd), females had behavioural acuity estimates that closely aligned with the anatomical predictions (3 cpd), while male behavioural estimates were lower (1-2 cpd), suggesting that behavioural acuity may be sexually dimorphic in this species. Lastly, retinal ganglion cell (RGC) topography was characterized by areas of high cell densities located centro-temporally and nasally, as well as a weak horizontal streak. The retinal maps presented here are the first such topographic maps for the family Poeciliidae.

### ***Retinal topography***

Retinal ganglion cell topography often relates to an animal's ecology through the 'terrain theory' (Hughes, 1977), which suggests that the organization of RGCs reflects the physical structure of an animal's environment. For example, fish species that live in spatially complex habitats like coral reefs often have well developed 'areas' of acute vision (Collin and Pettigrew, 1988a). Conversely, fish living in open environments with an uninterrupted view of the horizon, like pelagic or bottom dwelling species, often possess a horizontal 'streak' that allows them to view a broad area of the horizon with enhanced acuity, without the need for distinctive head and eye movements (Collin and Pettigrew, 1988b; Collin and Shand, 2003).

However, aside from the environment, several other ecological factors, such as feeding mode (de Busserolles et al., 2014; de Busserolles et al., 2021; Luehrmann et al., 2020), predator detection (Collin and Pettigrew, 1988a), competition (Stieb et al., 2019), and signalling traits (Parker et al. 2017), may also contribute to the evolution of specific retinal topography patterns. In the Ambon damselfish *Pomacentrus amboinensis*, for example, the higher density of RGC in the dorso-temporal part of the retina that extends centrally (Parker et al., 2017) may enhance their ability to discriminate the species-specific fine facial markings of their conspecifics (Siebeck, 2004; Siebeck et al., 2010). In the anemonefish *Amphiprion akindynos*, the horizontal streak may allow them to detect intruders from the safety of their anemone, while the peak density of RGC located in the central part of their retina may be useful in assessing conspecific body size during side-by-side swimming competitive encounters (Stieb et al. 2019).

Similarly, the centro-temporal elongated area and the weak horizontal streak found in *X. helleri* may enhance their ability to detect and discriminate sword length and/or body size, both of which are important visual signals that are horizontally-oriented in the fish's field of view during displays (e.g. Basolo, 1990a; Hemens, 1966; Rosenthal et al., 1996; Ryan and Causey, 1989). During courtship, for example, a male *X. helleri* will often orient himself transversely in front of a female and then wrap his body and sword in a u-shape around the head of the female, presenting his entire body and sword laterally in the female's field of view (Hemens, 1966). During male-male contests, swordtail males will often approach one another and display in a lateral orientation (as in *X. nigrensis*, Moretz, 2003), and the size of the opponents' bodies (as in *X. nigrensis*, Moretz, 2003) and swords (as in *X. helleri*, Benson and Basolo, 2006) play a role in determining which individual initiates and wins a contest. Given the lack of data on retinal topography in the genus *Xiphophorus*, or Poeciliids more broadly, however, we cannot be certain whether the topography pattern observed in *X. helleri* is a widely-shared trait, or whether it may be a specific adaptation for signal detection and assessment. Further



comparative work on related species with different signal forms (like spots in the guppy *Poecilia reticulata* or vertical bars in the humpbacked limia (*Limia nigrofasciata*) will lend further insight.

### ***Anatomical versus behavioural acuity***

Behaviourally, both an optomotor and a conditioned discrimination assay indicated that acuity is approximately 3cpd in females, but approximately 1cpd in males. There is inconsistency in the literature regarding whether acuity estimates from RGC density and behavioural assays align closely, although increasingly, data on acuity measured using both RGC density and behavioural methods are becoming available for species with camera-type eyes. Outside of fish, several studies have found close alignment between RGC and behavioural estimates. For example, close agreement was found between RGC acuity and acuity using a conditioned discrimination assay in the fat tailed dunnart *Sminthopsis crassicaudata* (RGC: 2.3cpd, behaviour: 2.36 cpd; Arrese et al., 1999), the northern quoll *Dasyurus quoll* (RGC: 2.6, behaviour: 2.8; Harman et al., 1986), and the northern leopard frog *Rana pipiens* (RGC 2.82, behaviour: 2.80; Aho, 1997). Similarly, some studies have found close agreement between RGC and optomotor acuities, as in Anna's hummingbird *Calypte anna* (RGC: 5.3, optomotor: 6cpd; Goller et al., 2019) and the common chameleon *Chamaeleo chamaeleon* (RGC: 7.4cpd, optomotor: 9cpd; Lev-Ari et al., 2017).

In fish, however, only a small number of studies have compared RGC acuity with acuity measured using a conditioned choice assay (data comparing RGC acuity with optomotor acuity in a single study are lacking), and in general they have found estimates from RGC density to be higher than behavioural estimates. For example, in the Ambon damselfish, acuity calculated using RGCs was 4.1cpd, but only 1.36 cpd when measured using a conditioned discrimination assay (Parker et al., 2017). Similar differences were found in the brown dottyback *Pseudochromis fuscus* (RGCs: 3.6 cpd, behaviour: 1.69cpd; Parker et al., 2017) and the triggerfish *Rhinecanthus aculeatus* (RGCs: 3.41cpd, behaviour: 1.75 cpd; Champ et al., 2014). In our study, however, RGC acuity was nearly identical to that derived from both behavioural methods, but only in females. In males, acuity estimated from RGC's was approximately three times higher than behavioural estimates.

There are several reasons why anatomical and behavioural methods may yield different estimates. First, not all ganglion cells contribute to acuity, so acuity estimates based on counts of all ganglion cells represent a theoretical upper limit on acuity, and behavioural acuity may be lower. Second, RGC density counts cannot take into account any processing of spatial information that occurs beyond the retina, which could affect an animal's spatial perception and subsequent behaviour. Third, the experimental parameters used in behavioural assays, as well as the criteria for

what constitutes a positive response, can affect acuity estimates. For example, the brightness of the ambient illumination and acclimation to experimental light conditions can affect acuity estimates (e.g. Abdeljalil et al., 2005; Caves et al., 2016; Thaung et al., 2002). We attempted to control for these factors in both of our behavioural assays by ensuring the brightness of the lighting conditions, as well as acclimation time, were the same in the optomotor and conditioned discrimination assays. In the conditioned assay, the choice of which cut-off threshold criterion to use can affect acuity estimates. Discrimination thresholds in similar assays have been commonly set at between 70 and 75% (e.g. Hodos and Yolen, 1976; Lind and Kelber, 2011; Parker et al., 2017; Potier et al., 2016; Temple et al., 2013), or as low as 65% (Champ et al., 2014). However, applying a 65% criterion to our data would not change our acuity estimates.

Although behavioural acuity estimates are often lower than anatomical estimates, several individuals in this study exhibited higher optomotor than anatomical acuity. One potential explanation for this is that there may have been slight positional differences between individuals during optomotor assays, which we could not avoid without physically restraining the fish's movements. Although we attempted to minimize variation in viewing distance, some fish may have moved slightly closer to the stimulus than others, resulting in higher apparent acuity. Additionally, optomotor assays inherently may confound an animal's ability to resolve detail with its ability to respond to motion, potentially making some rotating stimuli more resolvable than they would be when static (Nakayama 1985; Douglas and Hawryshyn 1990). We did, however, attempt to minimize these confounding effects by rotating the stimuli at the very low rate of 1 rpm, the slowest possible rotation speed that elicited a robust response during preliminary trials. Overall, however, our results suggest that with sufficient sample sizes, mean acuity obtained using an optomotor assay can align closely with acuity measured using other methods.

### ***Sexual dimorphism in acuity***

Regardless of why anatomical and behavioural estimates may not align, it is interesting that in this study the misalignment occurred only in males, but not in females. Eye and body size are known drivers of variation in acuity across species (Caves et al., 2018), and in some cases sexual dimorphism in eye or body size may explain sexual dimorphism in acuity. For example, one recent study of guppies *Poecilia reticulata* found higher optomotor acuity in females than males, although this dimorphism was attributable to females having overall larger body sizes (Corral-López et al., 2017). In this study, however, we observed no significant differences between males and females in either eye or body size; rather, for a given eye size, females exhibited higher acuity than males.

Sexual dimorphism in visual acuity is known primarily from insects, in which the morphology of the compound eye, and thus visual acuity, can differ dramatically between males and females. For example, in the bilobed eye of male march flies and mayflies, the upper lobe has been flattened to increase retinal sampling density within a narrow, upward field of view (Zeil, 1983a), which is useful when spotting small, fast-moving mates against the sky (Zeil, 1983b). In male hoverflies in the genus *Volucella*, males have frontally-oriented areas of heightened acuity that are more acute than equivalent zones in females (Warrant, 2001). In the same vein, even though total ganglion cell density and distribution was similar between sexes, female swordtails may have a higher proportion of ganglion cell subtypes involved in acuity tasks than males. This would explain why the sexual dimorphism was only detected behaviourally in our study.

Another possibility, given that retinal topography in males and females was essentially identical, is that the sexual dimorphism observed here occurs as a result of behavioural or attentional differences between males and females during experimental assays. Behavioural acuity in males might approach anatomical acuity if a different method was used to measure acuity, particularly if a method made use of more naturally-relevant behaviours than grating acuity. There could also be differences in post-retinal processing between males and females. For example, goldfish exhibit better binocular acuity than monocular acuity, implying that there may be some central contribution to acuity processing (Penzlin and Stubbe, 1977). However, how higher-order processing of spatial information may explain differences between anatomical and behavioural acuity, or differences in acuity between sexes, is not well-understood. Overall, two distinct behavioural tasks that measured grating acuity in different ways (the innate optomotor response versus a conditioned discrimination task) yielded the same difference in acuity between males and females (but not always the same acuity estimates in each individual, see Table S1), lending support to the conclusion that there is some sexual dimorphism in acuity in this species.

### ***Implications for signalling***

The acuity estimates reported here have implications for how male and female swordtails might resolve one another's signals during mate choice and agonistic encounters. Because acuity is distance-dependent (Fig. 6), smaller differences are resolvable from closer viewing distances. Thus, acuity can play an important role in determining a signal's active space, or the area of which a signal can propagate and be detected by a receiver (Gerhardt and Larry, 2009). For example, for a viewer with acuity of 3cpd, such as that found in females both anatomically and behaviourally, a 5 mm difference in sword length between two males would become unresolvable at a distance of 86 cm.

For a viewer with acuity of only 1 cpd, like that found behaviourally in males, that same difference would become unresolvable at only 29 cm (for calculation methods, see Coimbra et al., 2015).

Although detailed information on courtship distances in *X. helleri* is lacking, Hemens (1966) reported that the majority of active courtship involved males either resting at approximately 10 cm distance from the female or else actively courting her at a distance of only 2-3 cm. However, before active courtship begins, females may benefit from increased acuity, and the ability to detect males and discriminate differences between potential mates from greater distances, for several reasons. First, detecting a male from a greater distance may help females avoid costly aggression or harassment (e.g. Magurran and Seghers, 1994). Second, females may benefit from detecting an undesirable mate and thus avoid him approaching too closely, to minimize the chances of forced copulation, a common strategy in many fish (Ryan and Causey, 1989), including in the genus *Xiphophorus* (e.g. Morris et al., 2008; Ryan and Causey, 1989; Zimmerer and Kallman, 1989). Lastly, close display behaviour by males, which is a highly conspicuous activity, may attract the attention of predators and therefore increase the risk of predation to both parties (e.g. Magurran and Seghers, 1994b); if a female is able to determine from a greater distance whether or not she is interested in a given male, she could minimize this risk. Males, on the other hand, may not benefit from higher acuity. Because mating in *X. helleri* involves internal fertilization, mating requires physical contact between male and female, so males will nearly always benefit from closely approaching females. Additionally, in many Poeciliid fishes, males exhibit preferences for larger females (e.g., Basolo, 2004; Houde, 1987), which are also more fecund, although Thdor and Morris (2009) suggest that male swordtails determine which females are more fecund using non-visual information, such as olfactory cues. Male-male competition also appears to mostly occur at close distances, and thus doesn't require high acuity. In staged encounters between male *X. cortezi*, Moretz (2003) found that competitive bouts began with close approaches, and the majority of fights escalated to biting and continued displaying, all of which occurred at close range.

Of note, however, is that the behavioural acuity measurements reported here were collected under full-spectrum lighting in the shallow, clear, well-lit environment of our aquarium system, and from controlled, standardized viewing distances. Various aspects of a species' environment can of course affect its visual capability. Of particular relevance to many fish is turbidity; in turbid conditions, light scatters from suspended particles, attenuating high spatial frequencies and affecting the ability to resolve small details (Gazey, 1970; Wells, 1969). Additionally, acuity varies with changes in light level, as occurs in neighbouring shaded versus sunny patches, which can impact courtship display distance (as in guppies, Long and Rosenqvist, 1998). Therefore, acuity in natural environments may

be lower than that measured here, underscoring the importance of considering the environment in which signalling occurs before extrapolating from the measures generated in the laboratory to natural signalling behaviours.

Overall, this is one of the first studies of visual acuity in the family Poeciliidae, and lends insight into how this group may perceive visual signals during interactions with important fitness consequences, such as mate choice and aggression. This is also one of the first studies in fish to measure acuity in the same species using three different methods, and lends insight into how estimates generated using different experimental paradigms may compare to one another. We also found evidence that behavioural acuity in this group may be lower in males than females. If the sexually dimorphic acuity in swordtails observed in our behavioural assays extends to ecologically-relevant signalling interactions, even the relatively small difference between visual acuity of 1cpd and 3cpd can have implications for the information male and female viewers can potentially extract from visual scenes.

### **Acknowledgements**

We thank Wiebke Lammers, Rebecca Woodward, Daniela Farina, and Dr. Thomas Black for assistance with animal husbandry; Prof. Alastair Wilson for supplying us with wild-derived swordtails and logistical support; and Dr. Lengxob Yong for help with elastomer tagging.

### **Competing Interests**

The authors declare no competing interests.

### **Funding**

This project received funding from the European Union's Horizon 2020 research and innovation programme under the Marie Skłodowska-Curie grant agreement (No 793454) to EMC. FdB was supported by an Australian Research Council (ARC) DECRA (DE180100949). Stereology analysis performed at the Queensland Brain Institute Advanced Microscopy Facility using Stereo Investigator was supported by an ARC LIEF grant (LE100100074). LAK is funded by a Royal Society Dorothy Hodgkin Fellowship (DH160082).

### **Data availability**

All data and codes underlying the analyses in this paper have been uploaded to the Dryad data repository with this resubmission.

## References

- Abdeljalil, J., Hamid, M., Abdel-Mouttalib, O., Stéphane, R., Raymond, R., Johan, A., José, S., Pierre, C. and Serge, P.** (2005). The optomotor response: A robust first-line visual screening method for mice. *Vision Res.* **45**, 1439–1446.
- Aho, A.-C.** (1997). The visual acuity of the frog (*Rana pipiens*). *J. Comp. Physiol. A* **180**, 19–24.
- Arrese, C., Dunlop, S. a, Harman, a M., Braekevelt, C. R., Ross, W. M., Shand, J. and Beazley, L. D.** (1999). Retinal structure and visual acuity in a polyprotodont marsupial, the fat-tailed dunnart (*Sminthopsis crassicaudata*). *Brain. Behav. Evol.* **53**, 111–26.
- Baddeley, A. and Turner, R.** (2005). Spatstat: an R package for analyzing spatial point patterns. *J. Stat. Softw.* **12**, 1–42.
- Baerends, G. P., Bennema, B. E. and Vogelzang, A. A.** (1960). Über die Änderung der Sehschärfe mit dem Wachstum bei *Aequidens portalegrensis* (Hensel) (Pisces, Cichlidae). *Zool. Jahrbücher Abteilung für Syst. Oecologie und Geogr. der Tiere* **88**, 67–78.
- Basolo, A. L.** (1990a). Female preference for male sword length in the green swordtail, *Xiphophorus helleri* (Pisces: Poeciliidae). *Anim. Behav.* **40**, 332–338.
- Basolo, A. L.** (1990b). Female preference predates the evolution of the sword in swordtail fish. *Science* **250**, 808–810.
- Basolo, A. L.** (2004). Variation between and within the sexes in body size preferences. *Anim. Behav.* **68**, 75–82.
- Basolo, A. L. and Trainor, B. C.** (2002). The conformation of a female preference for a composite male trait in green swordtails. *Anim. Behav.* **63**, 469–474.
- Bates, D., Maechler, M., Bolker, B. and Walker, S.** (2015). Fitting linear mixed-effects models using lme4. *J. Stat. Softw.* **67**, 1–48.
- Benson, K. E. and Basolo, A. L.** (2006). Male-male competition and the sword in male swordtails, *Xiphophorus helleri*. *Anim. Behav.* **71**, 129–134.
- Bischoff, R. J., Gould, J. L. and Rubenstein, D. I.** (1985). Tail size and female choice in the guppy (*Poecilia reticulata*). *Behav. Ecol. Sociobiol.* **17**, 253–255.
- Browman, H. I., Gordon, W. C., Evan, B. I. and O'Brien, W. J.** (1990). Correlation between histological and behavioral measures of visual acuity in a zooplanktivorous fish, the white crappie (*Pomoxis annularis*). *Brain. Behav. Evol.* **35**, 85–97.

- Brünner, G.** (1934). Ueber die Sehschärfe der Erlitze (*Phoxinus laevis*) bei verschiedenen Helligkeiten. *Z. vergl. Physiol.* **21**, 296.
- Campbell, B. Y. F. W. and Gubisch, R. W.** (1967). The effect of chromatic aberration on visual acuity. *J. Physiol.* **192**, 345–358.
- Carvalho, P. S., Noltie, D. B. and Tillitt, D. E.** (2002). Ontogenetic improvement of visual function in the medaka *Oryzias latipes* based on an optomotor testing system for larval and adult fish. *Anim. Behav.* **64**, 1–10.
- Caves, E. M. and Johnsen, S.** (2017). AcuityView: An R package for portraying the effects of visual acuity on scenes observed by an animal. *Methods Ecol. Evol.* **9**, 793–797.
- Caves, E. M., Frank, T. M. and Johnsen, S.** (2016). Spectral sensitivity, spatial resolution, and temporal resolution and their implications for conspecific signalling in cleaner shrimp. *J. Exp. Biol.* **219**, 597–608.
- Caves, E. M., Sutton, T. T. and Johnsen, S.** (2017). Visual acuity in ray-finned fishes correlates with eye size and habitat. *J. Exp. Biol.* **220**, 1586–1596.
- Caves, E. M., Brandley, N. C. and Johnsen, S.** (2018). Visual acuity and the evolution of signals. *Trends Ecol. Evol.* **33**, 358–372.
- Caves, E. M., Troscianko, J. and Kelley, L. A.** (2020). A customizable, low-cost optomotor apparatus: A powerful tool for behaviourally measuring visual capability. *Methods Ecol. Evol.* **11**, 1319–1324.
- Champ, C., Wallis, G., Vorobyev, M., Siebeck, U. and Marshall, J.** (2014). Visual acuity in a species of coral reef fish: *Rhinecanthus aculeatus*. *Brain. Behav. Evol.* **83**, 31–42.
- Coimbra, J. P., Marceliano, M. L. V., da Silveira Andrade-da, B. L. and Yamada, E. S.** (2006). The retina of tyrant flycatchers: topographic organization of neuronal density and size in the ganglion cell layer of the great kiskadee *Pitangus sulphuratus* and the rusty margined flycatcher *Myiozetetes cayanensis* (Aves: Tyrannidae). *Brain. Behav. Evol.* **68**, 15–25.
- Coimbra, J. P., Trévia, N., Videira Marceliano, M. L., da Silveira Andrade-Da-Costa, B. L., Picanço-Diniz, C. W. and Yamada, E. S.** (2009). Number and distribution of neurons in the retinal ganglion cell layer in relation to foraging behaviors of tyrant flycatchers. *J. Comp. Neurol.* **514**, 66–73.



- Coimbra, J. P., Nolan, P. M., Collin, S. P. and Hart, N. S.** (2012). Retinal ganglion cell topography and spatial resolving power in penguins. *Brain. Behav. Evol.* **80**, 254–268.
- Coimbra, J. P., Kaswera-Kyamakya, C., Gilissen, E., Manger, P. R. and Collin, S. P.** (2015). The retina of Ansorge's cusimanse (*Crossarchus ansorgei*): number, topography and convergence of photoreceptors and ganglion cells in relation to ecology and behavior. *Brain. Behav. Evol.* **86**, 79–93.
- Collin, S. P. and Ali, M. A.** (1994). Multiple areas of acute vision in two freshwater teleosts, the creek chub, *Semotilus atromaculatus* (Mitchill) and the cutlips minnow, *Exoglossum maxillingua* (Lesueur). *Can. J. Zool.* **72**, 721–730.
- Collin, S. P. and Pettigrew, J. D.** (1988a). Retinal topography in reef teleosts. I. Some species with well-developed areae but poorly-developed streaks. *Brain. Behav. Evol.* **31**, 269–282.
- Collin, S. P. and Pettigrew, J. D.** (1988b). Retinal topography in reef teleosts II. Some species with prominent horizontal streaks and high-density areae. *Brain. Behav. Evol.* **31**, 283–295.
- Collin, S. P. and Pettigrew, J. D.** (1988c). Retinal ganglion cell topography in teleosts: A comparison between Nissl-stained material and retrograde labelling from the optic nerve. *J. Comp. Neurol.* **276**, 412–422.
- Collin, S. P. and Pettigrew, J. D.** (1989). Quantative comparisons of the limits on visual spatial resolution set by the ganglion cell layer in twelve species of reef teleosts. *Brain, Behav. Evol.* **34**, 184–192.
- Collin, S. P. and Shand, J.** (2003). Retinal sampling and the visual field in fishes. In *Sensory processing in aquatic environments*, pp. 139–169. New York, NY: Springer.
- Cook, R. D.** (1977). Detection of influential observation in linear regression. *Technometrics* **19**, 15–18.
- Corral-López, A., Garate-Olaizola, M., Buechel, S. D., Kolm, N. and Kotrschal, A.** (2017). On the role of body size , brain size , and eye size in visual acuity. *Behav. Ecol. Sociobiol.* **71**, 179.
- Cronin, T. W., Johnsen, S., Marshall, N. J. and Warrant, E. J.** (2014). *Visual Ecology*. Princeton, NJ: Princeton University Press.
- Cummings, M. E., Rosenthal, G. G. and Ryan, M. J.** (2003). A private ultraviolet channel in visual communication. *Proc. R. Soc. B Biol. Sci.* **270**, 897–904.

- Curcio, C. A. and Allen, K. A.** (1990). Topography of ganglion cells in human retina. *J. Comp. Neurol.* **300**, 5–25.
- de Busserolles, F., Marshall, N. J. and Collin, S. P.** (2014). Retinal ganglion cell distribution and spatial resolving power in deep-sea lanternfishes (myctophidae). *Brain. Behav. Evol.* **84**, 262–276.
- de Busserolles, F., Cortesi, F., Fogg, L., Stieb, S. M., Luehrmann, M. and Marshall, N. J.** (2021). The visual ecology of Holocentridae, a nocturnal coral reef fish family with a deep-sea-like multibank retina. *J. Exp. Biol.* **224**, jeb233098.
- Dobberfuhl, A. P., Ullmann, J. F. P. and Shumway, C. A.** (2005). Visual acuity, environmental complexity, and social organization in African cichlid fishes. *Behav. Neurosci.* **119**, 1648–1655.
- Douglas, R. H. and Hawryshyn, C. W.** (1990). Behavioural studies of fish vision: An analysis of visual capabilities. In *The Visual System of Fish* (ed. Douglas, R. H.) and Djarmoz, M. B. A.), pp. 373–418. Cambridge, UK: Chapman and Hall.
- Franck, D. and Hendricks, R.** (1973). Zur Frage der biologischen Bedeutung des Schwertfortsatzes von *Xiphophorus helleri*. *Behaviour* **44**, 167–184.
- Froese, R. and Pauly, D. eds.** (2000). *FishBase 2000: concepts, design, and data sources*. Los Baños, Laguna, Philippines: ICLARM.
- Garza-Gisholt, E., Hemmi, J. M., Hart, N. S. and Collin, S. P.** (2014). A comparison of spatial analysis methods for the construction of topographic maps of retinal cell density. *PLoS One* **9**, e93485.
- Gazey, B. K.** (1970). Visibility and resolution in turbid waters. *Underw. Sci. Technol. J.* **2**, 105–115.
- Gerhardt, H. C. and Larry, R. S.** (2009). Signal design rules in animal communication. *Encycl. Neurosci.* 791–798.
- Glaser, E. M. and Wilson, P. D.** (1998). The coefficient of error of optical fractionator population size estimates: a computer simulation comparing three estimators. *J. Microsc.* **192**, 163–171.
- Goller, B., Fellows, T. K., Dakin, R., Tyrrell, L., Fernández-Juricic, E. and Altshuler, D. L.** (2019). Spatial and temporal resolution of the visual system of the Anna's hummingbird (*Calypte anna*) relative to other birds. *Physiol. Biochem. Zool.* **92**, 481–495.

- Gonzalez-Bellido, P. T., Wardill, T. J. and Juusola, M.** (2011). Compound eyes and retinal information processing in miniature dipteran species match their specific ecological demands. *Proc. Natl. Acad. Sci. U. S. A.* **108**, 4224–4229.
- Harman, A. M., Nelson, J. E., Crewther, S. G. and Crewther, D. P.** (1986). Visual acuity of the northern native cat (*Dasyurus hallucatus*) - Behavioural and anatomical estimates. *Behav. Brain Res.* **22**, 211–216.
- Haug, M. F., Biehlmaier, O., Mueller, K. P. and Neuhauss, S. C.** (2010). Visual acuity in larval zebrafish: behavior and histology. *Front. Zool.* **7**, 8.
- Hemens, J.** (1966). The ethological significance of the sword-tail in *Xiphophorus hellerii* (Haekel). *Behaviour* **27**, 290–315.
- Hodos, W. and Yolen, N. M.** (1976). Behavioral correlates of tectal compression in goldfish 2. Visual acuity. *Brain. Behav. Evol.* **13**, 468–474.
- Houde, A. E.** (1987). Mate choice based upon naturally occurring color-pattern variation in a guppy population. *Evolution* **41**, 1–10.
- Hughes, A.** (1975). A quantitative analysis of the cat retinal ganglion cell topography. *J. Comp. Neurol.* **163**, 107–128.
- Hughes, A.** (1977). The topography of vision in mammals of contrasting lifestyle: comparative optics and retinal organisation. In *Handbook of Sensory Physiology, Vol. 7* (ed. Crescitelli, F.), pp. 613–756. Berlin: Springer-Verlag.
- Kodric-Brown, A. and Johnson, S. C.** (2002). Ultraviolet reflectance patterns of male guppies enhance their attractiveness to females. *Anim. Behav.* **63**, 391–396.
- Kodric-Brown, A. and Nicoletto, P. F.** (2001). Female choice in the guppy (*Poecilia reticulata*): The interaction between male color and display. *Behav. Ecol. Sociobiol.* **50**, 346–351.
- Kodric and -Brown, A.** (1993). Female choice of multiple male criteria in guppies: interacting effects of dominance, coloration and courtship. *Behav. Ecol. Sociobiol.* **32**, 415–420.
- Lee, H. R. and O'Brien, K. M. B.** (2011). Morphological and behavioral limit of visual resolution in temperate (*Hippocampus abdominalis*) and tropical (*Hippocampus taeniopterus*) seahorses. *Vis. Neurosci.* **28**, 351–360.

- Lev-Ari, T., Katz, H. K., Lustig, A. and Katzir, G.** (2017). Visual acuity and optokinetic directionality in the common chameleon (*Chamaeleo chamaeleon*). *EC Ophthalmology* **6.5**, 145–154.
- Lind, O. and Kelber, A.** (2011). The spatial tuning of achromatic and chromatic vision in budgerigars. *J. Vis.* **11**, 1–9.
- Long, K. D. and Rosenqvist, G.** (1998). Changes in male guppy courting distance in response to a fluctuating light environment. *Behav. Ecol. Sociobiol.* **44**, 77–83.
- Luehrmann, M., Cortesi, F., Cheney, K. L., de Busserolles, F. and Marshall, N. J.** (2020). Microhabitat partitioning correlates with opsin gene expression in coral reef cardinalfishes (Apogonidae). *Funct. Ecol.* **34**, 1041–1052.
- MacLaren, R. D.** (2017). Effects of male apparent length on female preference for absolute body size in *Xiphophorus helleri*. *Acta Ethol.* **20**, 27–36.
- MacLaren, R. D., Rowland, W. J. and Morgan, N.** (2004). Female preferences for sailfin and body size in the sailfin molly, *Poecilia latipinna*. *Ethology* **110**, 363–379.
- MacLaren, R. D., Gagnon, J. and He, R.** (2011). Female bias for enlarged male body and dorsal fins in *Xiphophorus variatus*. *Behav. Processes* **87**, 197–202.
- Magurran, A. E. and Seghers, B. H.** (1994a). A cost of sexual harassment in the guppy, *Poecilia reticulata*. *Proc. R. Soc. B* **258**, 89–92.
- Magurran, A. E. and Seghers, B. H.** (1994b). Sexual conflict as a consequence of ecology: evidence from guppy, *Poecilia reticulata*, populations in Trinidad. *Proc. R. Soc. B* **255**, 31–36.
- Matthiessen, L.** (1882). Über die Beziehungen, Welche Zwischen dem Brechungsindex des Kernsentrums der Krystalllinse und den Dimensionen des Auges Bestehen. *Pflügers Arch. ges. Physiol.* **27**, 510–523.
- McCann, G. D. and MacGinitie, G. F.** (1965). Optomotor response studies of insect vision. *Proc. R. Soc. London B* **163**, 369–401.
- Moretz, J. A.** (2003). Aggression and RHP in the Northern swordtail fish, *Xiphophorus cortezi*: the relationship between size and contest dynamics in male-male competition. *Ethology* **109**, 995–1008.

- Morris, M. R., Rios-Cardenas, O. and Darrah, A.** (2008). Male mating tactics in the northern mountain swordtail fish (*Xiphophorus nezahualcoyotl*): Coaxing and coercing females to mate. *Ethology* **114**, 977–988.
- Mundry, R. and Nunn, C. L.** (2009). Stepwise model fitting and statistical inference: Turning noise into signal pollution. *Am. Nat.* **173**, 119–123.
- Neave, D. A.** (1984). The development of visual acuity in larval plaice (*Pleuronectes platessa* L.) and turbot (*Scophthalmus maximus* L.). *J. Exp. Mar. Biol. Ecol.* **78**, 167–175.
- Niv, Y., Joel, D. and Dayan, P.** (2006). A normative perspective on motivation. *Trends Cogn. Sci.* **10**, 375–381.
- Parker, A. N., Fritsches, K. A., Newport, C., Wallis, G. and Siebeck, U. E.** (2017). Comparison of functional and anatomical estimations of visual acuity in two species of coral reef fish. *J. Exp. Biol.* **220**, 2387–2396.
- Penzlin, V. H. and Stubbe, M.** (1977). Studies on the visual acuity in the Goldfish. *Zool. Jb. Physiol. Bd.* **81**, 310–326.
- Pettigrew, J. D. and Manger, P. R.** (2008). Retinal ganglion cell density of the black rhinoceros (*Diceros bicornis*): calculating visual resolution. *Vis. Neurosci.* **25**, 215–220.
- Pettigrew, J. D., Dreher, B., Hopkins, C. S., McCall, M. J. and Brown, M.** (1988). Peak density and distribution of ganglion cells in the retinae of Microchiropteran bats: implications for visual acuity. *Brain, Behav. Evol.* **32**, 39–56.
- Pita, D., Moore, B. A., Tyrrell, L. P. and Fernández-Juricic, E.** (2015). Vision in two cyprinid fish: Implications for collective behavior. *PeerJ* 1113.
- Potier, S., Bonadonna, F., Kelber, A., Martin, G. R., Isard, P.-F., Dulaurent, T. and Duriez, O.** (2016). Visual abilities in two raptors with different ecology. *J. Exp. Biol.* **219**, 2639–2649.
- R Development Core Team** (2019). R: a language and environment for statistical computing. R Foundation for Statistical Computing, Vienna, Austria. URL <https://www.R-project.org/>.
- Reymond, L.** (1985). Spatial visual acuity of the eagle *Aquila audax*: A behavioural, optical and anatomical investigation. *Vision Res.* **25**, 1477–1491.
- Rosenthal, G. G. and Evans, C. S.** (1998). Female preference for swords in *Xiphophorus helleri* reflects a bias for large apparent size. *Proc. Natl. Acad. Sci. USA* **95**, 4431–4436.

- Rosenthal, G. G., Evans, C. S. and Miller, W. L.** (1996). Female preference for dynamic traits in the green swordtail, *Xiphophorus helleri*. *Anim. Behav.* **51**, 811–820.
- Ryan, M. J. and Causey, B. A.** (1989). “Alternative” mating behavior in the swordtails *Xiphophorus nigrensis* and *Xiphophorus pygmaeus* (Pisces: Poeciliidae ). *Behav. Ecol. Sociobiol.* **24**, 341–348.
- Ryan, M. J. and Wagner, W. E.** (1987). Asymmetries in mating preferences between species: Female swordtails prefer heterospecific males. *Science* **236**, 595–597.
- Schlupp, I., Riesch, R., Tobler, M., Plath, M., Parzefall, J. and Scharl, M.** (2010). A novel, sexually selected trait in poeciliid fishes: Female preference for mustache-like, rostral filaments in male *Poecilia sphenops*. *Behav. Ecol. Sociobiol.* **64**, 1849–1855.
- Schlüter, A., Parzefall, J. and Schlupp, I.** (1998). Female preference for symmetrical vertical bars in male sailfin mollies. *Anim. Behav.* **56**, 147–153.
- Schneider, C. A., Rasband, W. S. and Eliceiri, K. W.** (2012). NIH Image to ImageJ: 25 years of image analysis. *Nat. Methods* **9**, 671–675.
- Shand, J., Chin, S. M., Harman, A. M., Moore, S. and Collin, S. P.** (2000). Variability in the location of the retinal ganglion cell area centralis is correlated with ontogenetic changes in feeding behavior in the black bream, *Acanthopagrus butcheri* (Sparidae, Teleostei). *Brain. Behav. Evol.* **55**, 176–190.
- Siebeck, U. E.** (2004). Communication in coral reef fish: The role of ultraviolet colour patterns in damselfish territorial behaviour. *Anim. Behav.* **68**, 273–282.
- Siebeck, U. E., Parker, A. N., Sprenger, D., Mäthger, L. M. and Wallis, G.** (2010). A species of reef fish that uses ultraviolet patterns for covert face recognition. *Curr. Biol.* **20**, 407–410.
- Stieb, S. M., de Busserolles, F., Carleton, K. L., Cortesi, F., Chung, W.-S., Dalton, B. E., Hammond, L. A. and Marshall, N. J.** (2019). A detailed investigation of the visual system and visual ecology of the Barrier Reef anemonefish, *Amphiprion akindynos*. *Sci. Rep.* **9**, 1–14.

- Stone, J.** (1981). *The whole mount handbook: a guide to the preparation and analysis of retinal whole mounts*. Maitland.
- Tamura, T. and Wisby, W. J.** (1963). The visual sense of pleagic fishes especially the visual axis and accommodation. *Bull. Mar. Sci.* **13**, 433–448.
- Temple, S. E., Manietta, D. and Collin, S. P.** (2013). A comparison of behavioural (Landolt C) and anatomical estimates of visual acuity in archerfish (*Toxotes chatareus*). *Vision Res.* **83**, 1–8.
- Tettamanti, V., de Busserolles, F., Lecchini, D., Marshall, N. J. and Cortesi, F.** (2019). Visual system development of the spotted unicornfish, *Naso brevirostris* (Acanthuridae). *J. Exp. Biol.* **222**, jeb209916.
- Thaung, C., Arnold, K., Jackson, I. J. and Coffey, P. J.** (2002). Presence of visual head tracking differentiates normal sighted from retinal degenerate mice. *Neurosci. Lett.* **325**, 21–24.
- Thdor, M. S. and Morris, M. R.** (2009). Variation in male mate preference for female size in the swordtail *Xiphophorus malinche*. *Behaviour* **146**, 727–740.
- Troscianko, J. and Stevens, M.** (2015). Image Calibration and Analysis Toolbox - a free software suite for objectively measuring reflectance, colour and pattern. *Methods Ecol. Evol.* **6**, 1320–1331.
- Ullmann, J. F. P., Moore, B. A., Temple, S. E., Fernández-Juricic, E. and Collin, S. P.** (2012). The retinal wholemount technique: a window to understanding the brain and behaviour. *Brain. Behav. Evol.* **79**, 26–44.
- Warrant, E. J.** (2001). The design of compound eyes and the illumination of natural habitats. In *Ecology of Sensing*, pp. 187–213. Springer.
- Wells, W. H.** (1969). Loss of resolution in water as a result of multiple small angle scattering. *J. Opt. Soc. Am.* **59**, 686–691.
- West, M. J., Slomianka, L. and Gundersen, H. J. G.** (1991). Unbiased stereological estimation of the total number of neurons in the subdivisions of the rat hippocampus using the optical fractionator. *Anat. Rec.* **231**, 482–497.
- Westheimer, G. and McKee, S. P.** (1975). Visual acuity in the presence of retinal-image motion. *J. Opt. Soc. Am.* **65**, 847–850.



- Zeil, J.** (1983a). Sexual dimorphism in the visual system of flies: The compound eyes and neural superposition in bibionidae (Diptera). *J. Comp. Physiol. A* **150**, 379–393.
- Zeil, J.** (1983b). Sexual dimorphism in the visual system of flies: The free flight behaviour of male bibionidae (Diptera). *J. Comp. Physiol. A* **150**, 395–412.
- Zimmerer, E. J. and Kallman, K. D.** (1989). Genetic basis for alternative reproductive tactics in the pygmy swordtail, *Xiphophorus nigrensis*. *Evolution* **43**, 1298–1307.

## Figures and Tables

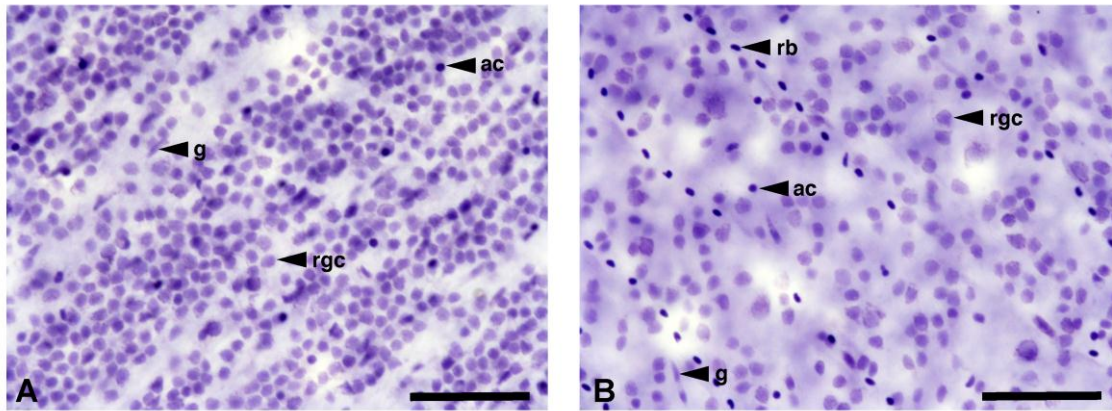

**Figure 1.** Light micrographs of the Nissl-stained ganglion cell layer of a representative female swordtail fish in the peak-density area (A) and in a low-density area (ventral, B). rgc – retinal ganglion cells, ac = displaced amacrine cells, g = glial cells, rb = red blood cells. Scale bar = 50  $\mu\text{m}$ .

(A) Optomotor apparatus

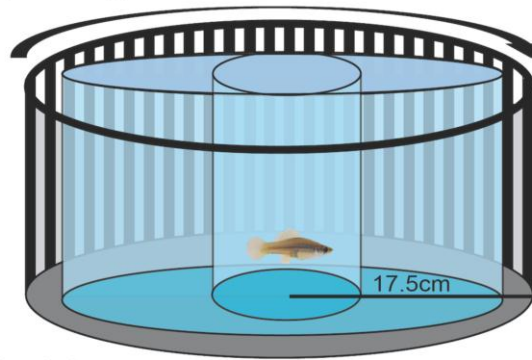

(B) Two-choice test

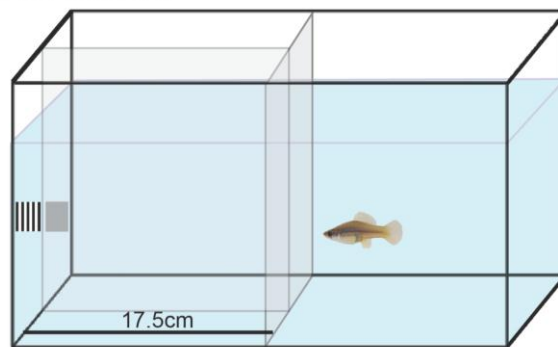

**Figure 2.** Schematic of (A) optomotor and (B) two-choice test experimental setup. In (A) the striped stimulus rotates around the fixed cylindrical testing arena. Variation in viewing distance between the animal and the stimuli was minimized by placing the animal inside a second, smaller cylinder. In (B), fish chose to approach either a striped stimulus or a grey stimulus of the same mean luminance, and were rewarded with a bloodworm for correctly approaching the grey (positive) stimulus. Fish initially viewed the stimuli from a given distance by using a central divider and a transparent barrier.

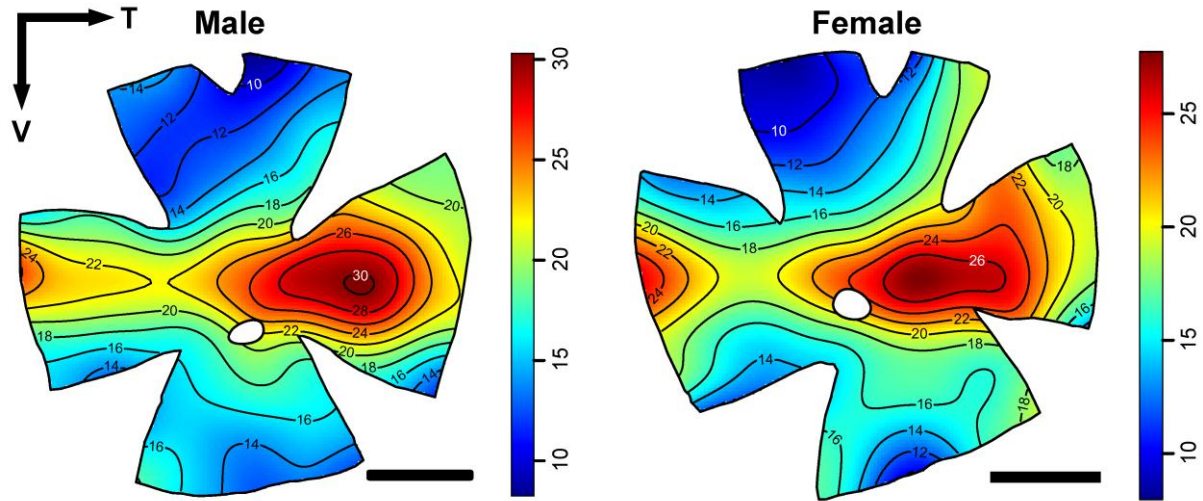

**Figure 3.** Topographic distribution of RGCs in the retina of the green swordtail *Xiphophorus helleri*, for one representative male (left) and one representative female (right). The black lines represent iso-density contours and values are expressed in densities  $\times 10^3$  cells  $\text{mm}^{-2}$ . The white spot in the middle of each retina is the optic nerve. The black arrow indicates the orientation of the retinas. T, temporal; V, ventral. Scale bars = 1 mm.

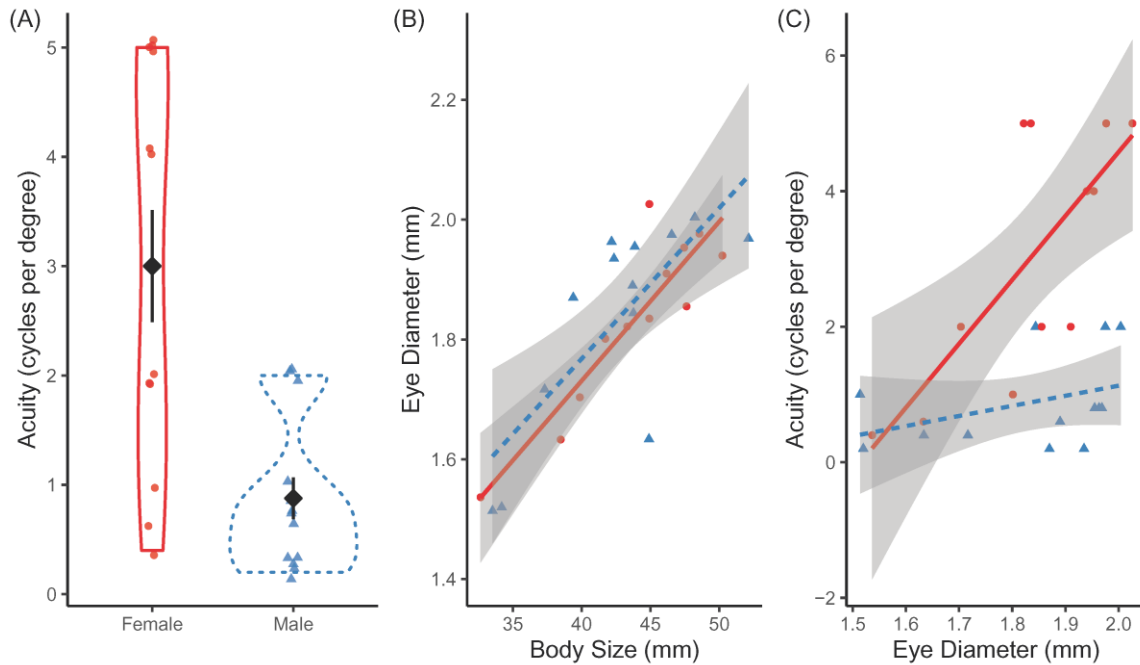

**Figure 4.** Optomotor acuity, eye size, and body size in male (blue dashed line and triangles,  $n=13$ ) and female (red solid line and circles,  $n=12$ ) green swordtails. (A) Mean optomotor acuity in females is significantly higher than in males (non-parametric Kruskal-Wallis rank sum test,  $\chi^2(1) = 8.67$ ,  $p = 0.003$ ). Diamonds represent means and lines represent standard error. (B) The relationship between eye diameter and body size does not differ in males and females, although (C) for a given eye size, females have higher acuity. In (B) and (C), the grey shaded regions show 95% confidence intervals.

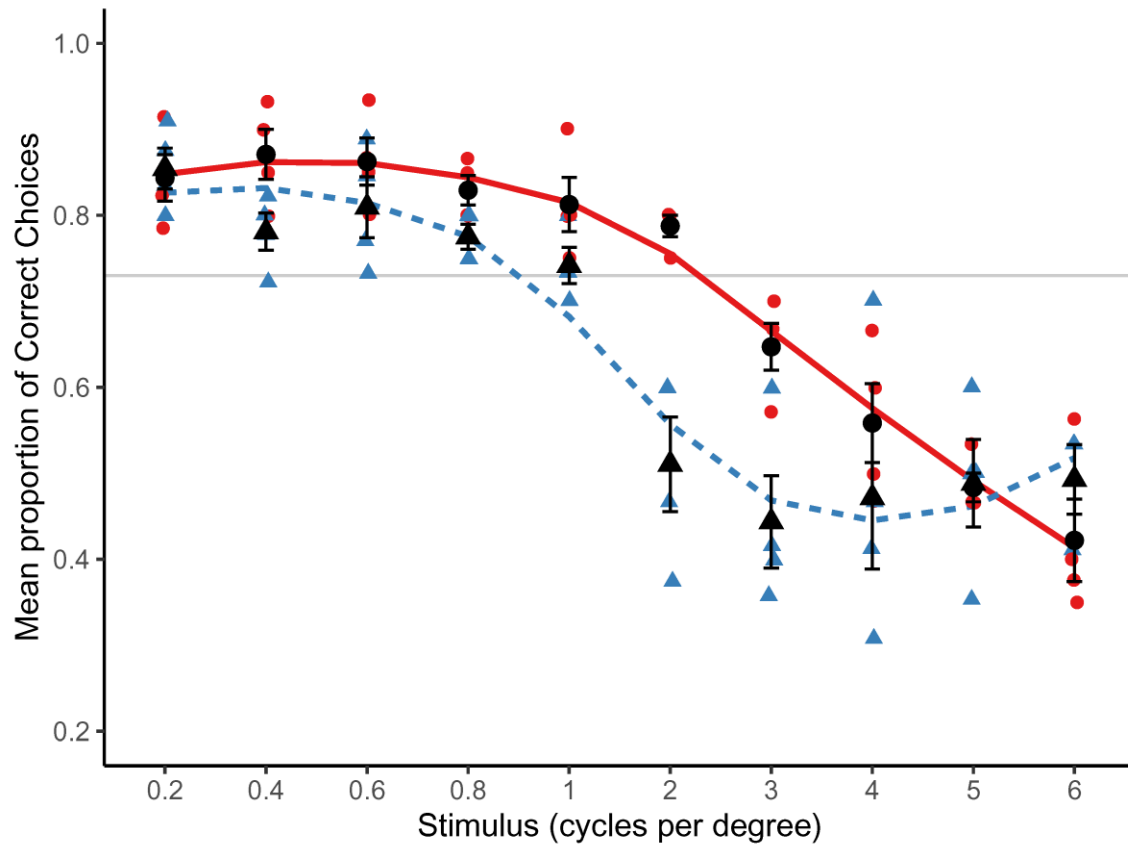

**Figure 5.** Acuity estimates from a conditioned discrimination assay in green swordtail females (red solid line, circles,  $n=4$ ) and males (blue dashed line, triangles,  $n=4$ ). Black symbols show means, error bars show standard errors. Trendlines for males and females were fitted using LOESS smoothing. The horizontal grey line is at 0.73, the threshold criterion above which fish performed significantly better than chance at discriminating between solid grey and grating stimuli.

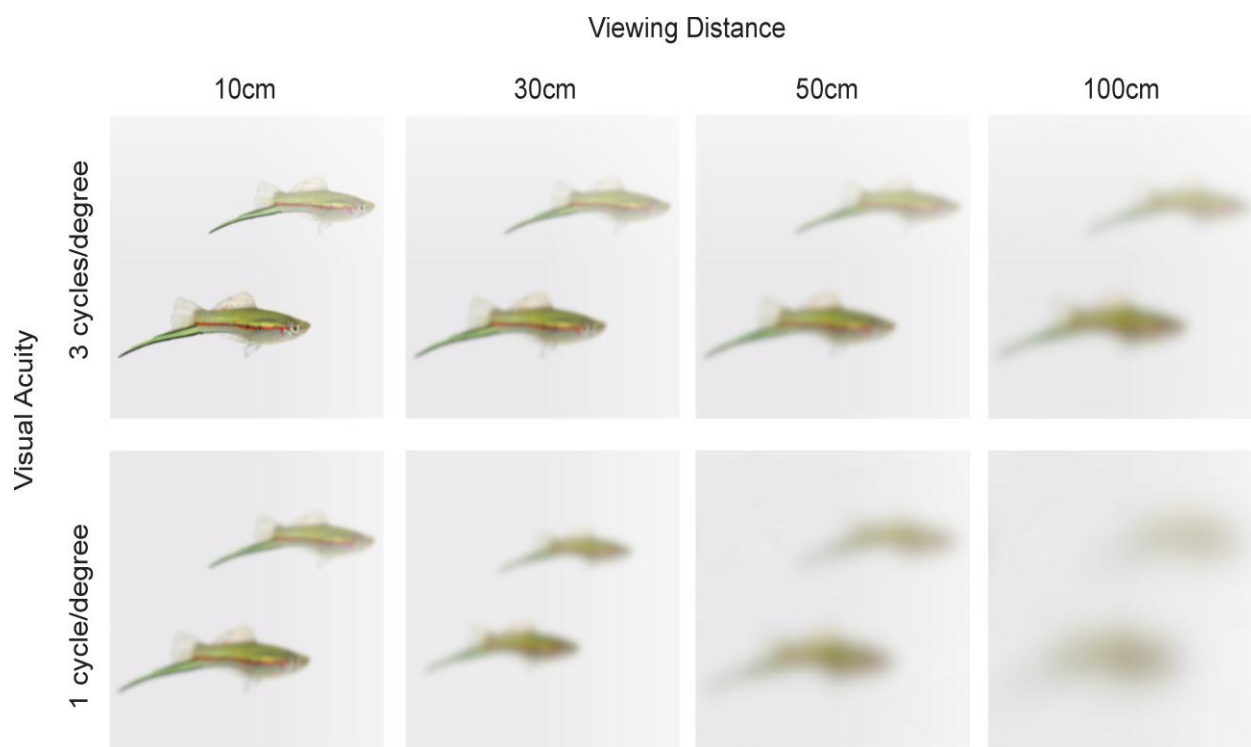

**Figure 6.** Two male green swordtails *Xiphophorus helleri*, which differ in sword length and body size, as the spatial aspects of this scene might appear at four different viewing distances to viewers with acuity of 3 cycles per degree (as in females; top row) or 1 cycle/degree (as in males; bottom row). These images were created using the R package *AcuityView* (Caves and Johnsen, 2017), which uses Fourier methods to delete spatial frequencies from an image that are below the acuity of a given viewer from a given distance. In *AcuityView*, the image was assumed to be 12cm across, resulting in the two male swordtails having swords that differ in length by 5mm, as in the example in the text.

**Table 1.** Summary of the stereology parameters used for the RGC topographic analysis, and the data obtained using the optical fractionator method. Ø = diameter, CE = Schaeffer coefficient of error, VA = visual acuity, cpd = cycles per degree.

| Sex    | ID | Eye Ø (mm) | Lens Ø (mm) | Grid (µm x µm) | CE    | Total cells | Peak density (cells/mm <sup>2</sup> ) | VA (cpd) |
|--------|----|------------|-------------|----------------|-------|-------------|---------------------------------------|----------|
| Male   | A  | 3.4        | 1.35        | 250 x 250      | 0.029 | 201,284     | 34,167                                | 3.1      |
|        | B  | 3.3        | 1.30        | 250 x 250      | 0.031 | 208,559     | 34,445                                | 3.0      |
|        | C  | 3.3        | 1.30        | 250 x 250      | 0.027 | 228,368     | 35,278                                | 3.0      |
| Female | D  | 3.6        | 1.40        | 280 x 280      | 0.028 | 213,531     | 27,500                                | 2.8      |
|        | E  | 3.7        | 1.45        | 300 x 300      | 0.029 | 223,725     | 27,222                                | 2.9      |
|        | F  | 3.2        | 1.20        | 250 x 250      | 0.028 | 207,829     | 36,389                                | 2.9      |



**Table 2.** Model coefficients, standard errors, t-statistics, F-statistics, and p-values for the linear models predicting eye size from body size and sex, as well as optomotor acuity from eye size and sex. A (\*) indicates an interaction term.

| Model                             | Term         | Coefficient | Std. Error | T (df)     | F (df)   | p      |
|-----------------------------------|--------------|-------------|------------|------------|----------|--------|
| <b>Eye size ~ body size + sex</b> | Intercept    | 0.70        | 0.17       | 4.13 (22)  |          |        |
|                                   | Body Size    | 0.03        | 0.004      | 6.74 (22)  | 45.4 (1) | <0.001 |
|                                   | Sex          | 0.03        | 0.04       | 0.85 (22)  | 0.71 (1) | 0.40   |
| <b>Acuity ~eye size*sex</b>       | Intercept    | -14.3       | 3.82       | -3.74 (21) |          |        |
|                                   | Eye Size     | 9.44        | 2.08       | 4.54 (21)  | 20.6 (1) | <0.001 |
|                                   | Sex          | 12.4        | 4.90       | 2.54 (21)  | 6.46 (1) | 0.02   |
|                                   | Eye Size*Sex | -7.95       | 2.66       | -2.98 (21) | 8.89 (1) | 0.01   |

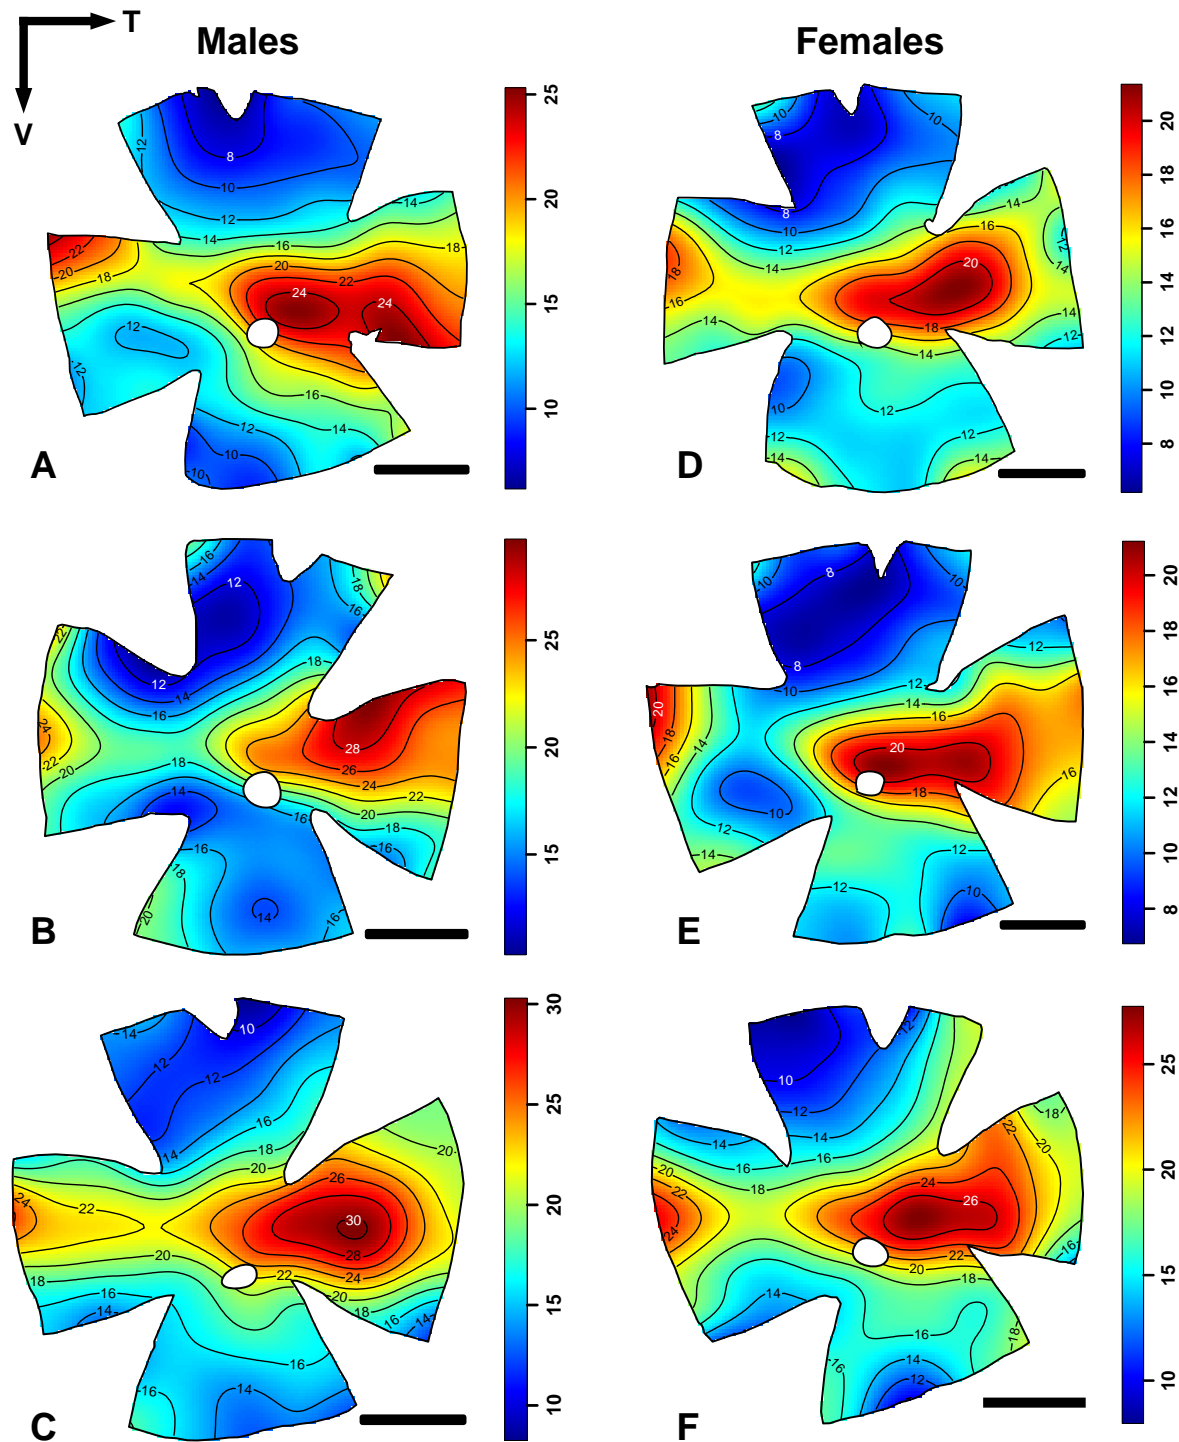

**Fig. S1.** Topographic distribution of RGCs in the retina of the green swordtail, *Xiphophorus helleri*, for each of the three males (A-C) and three females (D-F) examined in this study. The black lines represent iso-density contours and values are expressed in densities  $\times 10^3$  cells  $\text{mm}^{-2}$ . The white spot in the middle of each retina is the optic nerve. The black arrow indicates the orientation of the retinas. T, temporal; V, ventral. Scale bars = 1 mm.

**Table S1.** Comparison of behavioural acuity in individuals measured using both an optomotor assay and the trained grating choice method. Note that in some cases elastomer tags changed during the experiment (were added or lost); to ensure that these data are comparable with those in the supplemental R code analysis file, alternate Fish ID's are also given here.

| <b>Fish ID</b>      | <b>Sex</b> | <b>Optomotor Acuity (cpd)</b> | <b>Grating choice acuity (cpd)</b> | <b>Alternate Fish ID</b> |
|---------------------|------------|-------------------------------|------------------------------------|--------------------------|
| <b>BlueBlue</b>     | Female     | 5                             | 2                                  |                          |
| <b>BluePink</b>     | Female     | 2                             | 2                                  |                          |
| <b>GreenBlue</b>    | Female     | 5                             | 2                                  | GreenGreen               |
| <b>RedRed</b>       | Female     | 1                             | 2                                  |                          |
| <b>BlueBlueBlue</b> | Male       | 0.8                           | 1                                  | X1C Male 1               |
| <b>BlueGreen</b>    | Male       | 1                             | 1                                  | X3C Male 2               |
| <b>Green</b>        | Male       | 0.6                           | 1                                  | GreenGreen               |
| <b>RedOrange</b>    | Male       | 2                             | 0.8                                |                          |
